# Supplementary material for: Identification of Clinically Relevant Fungi and Prototheca Species by rRNA Gene Sequencing and Multilocus PCR Coupled with Electrospray Ionization Mass Spectrometry
Source: PLoS One. 2014 May 16;9(5):e98110. doi: 10.1371/journal.pone.0098110 (PMC4024029; doi:10.1371/journal.pone.0098110)
Supplement: Table S1 — Inconsistent results among rRNA gene sequencing and phenotypic identification. (DOC) [file pone.0098110.s001.doc]

Table S1. Inconsistent results among rRNA gene sequencing and phenotypic identification.

| rRNA gene sequencing | | | |  |  |
| --- | --- | --- | --- | --- | --- |
| ITS1 | ITS2 | D1/D2 | ITS1+TIS2+D1/D2 | Phenotypic identification | Micro ID |
| Yeasts (n=16) | | | | | |
| *Candida haemulonii* | *C. haemulonii* | *C. haemulonii* | *C. haemulonii* | *Candida spp.* | *C. haemulonii* |
| *Candida orthopsilosis* | *C. orthopsilosis* | *Candida spp.* 1 | *C. orthopsilosis* | *Candida parapsilosis* | *C. orthopsilosis* |
| *Candida tropicalis* | *C. tropicalis* | *C. tropicalis* | *C. tropicalis* | *Candida rugosa* | *C. tropicalis* |
| *Pichia guilliermondii* | *P. guilliermondii* | *P. guilliermondii* | *P. guilliermondii* | *Candida. glabrata* | *P. guilliermondii* |
| *Pichia membranifaciens* | NI2 | *P. membranifaciens* | *P. membranifaciens* | *Pichia kudriavzevii* | *P. membranifaciens* |
| *Pichia spp.* 3 | *Pichia anomala* | *P. anomala* | *P. anomala* | *C. glabrata* | *P. anomala* |
| *Pichia spp.* 4 | *Pichia spp.* 4 | *Pichia norvegensis* | *P. norvegensis* | *Candida spp.* | *P. norvegensis* |
| *Rhodotorula mucilaginosa* | *R. mucilaginosa* | *R. mucilaginosa* | *R. mucilaginosa* | *Rhodotorula spp.* | *R.mucilaginosa* |
| *R. mucilaginosa* | *R.mucilaginosa* | *R. mucilaginosa* | *R. mucilaginosa* | *Rhodotorula spp.* | *R.mucilaginosa* |
| *Trichosporon spp.* 5 | *Trichosporon spp.* 6 | *Trichosporon asahii* | *T. asahii* | *Trichosporon spp.* | *T. asahii* |
| *Trichosporon spp.* 5 | *T. asahii* | *T. asahii* | *T. asahii* | *Trichosporon spp.* | *T. asahii* |
| *Colletotrichum spp.* 7 | *Colletotrichum spp.* 8 | *Colletotrichum capsici* | *C. capsici* | Unidentified yeast | *C. capsici* |
| *Trichosporon spp.* 9 | *Trichosporon spp.* 9 | *Trichosporon spp.* 9 | *Trichosporon spp.* 9 | *Candida famata* | *Trichosporon spp.* 9 |
| *Pichia spp.* 10 | *Pichia spp.* 10 | *Pichia spp.* 10 | *Pichia spp.* 10 | *P. guilliermondii* | *Pichia spp.* 10 |
| *Candida spp.* 11 | *Candida spp.* 12 | *Candida spp.* 11 | *Candida spp.* 11 | *C. parapsilosis* | *Candida spp.* 11 |
| *Candida spp.* 13 | NI 14 | *Candida spp.* 13 | *Candida spp.* 13 | *C. parapsilosis* | *Candida spp.* 13 |
| Filamentous fungi (n=19) | | | | | |
| *Aspergillus spp.* 15 | *Aspergillus spp.* 15 | *Aspergillus spp.* 16 | *Aspergillus spp.* 15 | *Aspergillus flavus* | *A. flavus* |
| *Aspergillus spp.* 15 | *Aspergillus spp.* 15 | *Aspergillus spp.* 16 | *Aspergillus spp.* 15 | *A. flavus* | *A. flavus* |
| *Aspergillus versicolor* | *A. versicolor* | *A. versicolor* | *A. versicolor* | *Aspergillus spp.* | *A. versicolor* |
| *Mucor circinelloides* | *M. circinelloides* | *M. circinelloides* | *M. circinelloides* | *Mucor spp.* | *M. circinelloides* |
| *Mucor irregularis* | *M. irregularis* | *M. hiemalis* | *M. irregularis* | *Rhizomucor spp.* | *M. irregularis* |
| *Rhizopus microsporus* | *Rhizopus spp.* 17 | *R. microsporus* | *R. microsporus* | *Rhizopus spp.* | *R. microsporus* |
| *Rhizopus oryzae* | *R. oryzae* | *Rhizopus spp.* 18 | *R. oryzae* | *Mucor spp.* | *R. oryzae* |
| *R. oryzae* | *R. oryzae* | *R. oryzae* | *R. oryzae* | *Rhizopus spp.* | *R. oryzae* |
| *R. oryzae* | *R. oryzae* | *R. oryzae* | *R. oryzae* | *Rhizopus spp.* | *R. oryzae* |
| *Rhizomucor pusillus* | *R. pusillus* | *R. pusillus* | *R. pusillus* | *Mucor spp.* | *R. pusillus* |
| *Lichtheimia corymbifera* | *L. corymbifera* | *L. corymbifera* | *L. corymbifera* | *Lichtheimia spp.* | *L. corymbifera* |
| NI 19 | *L. corymbifera* | NI 20 | *L. corymbifera* | *Lichtheimia spp.* | *L. corymbifera* |
| *Paecilomyces spp.* 21 | *Paecilomyces variotii* | *P. variotii* | *P. variotii* | *Paecilomyces spp.* | *P. variotii* |
| *Fusarium oxysporum* | *F. oxysporum* | *F. oxysporum* | *F. oxysporum* | *Fusarium spp.* | *F. oxysporum* |
| *Fusarium solani* | *F. solani* | *F. solani* | *F. solani* | *Fusarium spp.* | *F. solani* |
| *Ulocladium spp.* 22 | *Ulocladium spp.* 22 | NI 23 | *Ulocladium spp.* 22 | *Ulocladium spp.* | *Ulocladium spp.* 22 |
| *Aspergillus spp.* 15 | NI 24 | *Aspergillus spp.* 15 | *Aspergillus spp.* 15 | *Aspergillus spp.* | *Aspergillus spp.* 15 |
| *Aspergillus spp.* 25 | *Aspergillus spp.* 26 | *Aspergillus spp.* 26 | *Aspergillus spp.* 26 | *Aspergillus spp.* | *Aspergillus spp.* 26 |
| NI 27 | NI 28 | *Aspergillus spp.* 26 | *Aspergillus spp.* 26 | *Aspergillus spp.* | *Aspergillus spp.* 26 |
| *Prototheca spp.* (n=2) | | | | | |
| NI 29 | NI 30 | *Prototheca zopfii* | *P. zopfii* | *Prototheca spp.* | *P. zopfii* |
| NI 30 | NI 30 | *P. zopfii* | *P. zopfii* | *Prototheca spp.* | *P. zopfii* |

1 *C. orthopsilosis*/*C. parapsilosis*, 2 84% homology to *P. membranifaciens*, 3 97% homology to *P. anomala*, 4 97% homology to *P. norvegensis*, 5 *T. asahii*/*Trichosporon insectorum*/*Trichosporon faecale*, 6 96% homology to *T. asahii*, 7 *Colletotrichum dematium*/*C. capsici*, 8 *Colletotrichum truncatum*/*C. capsici*, 9 *Trichosporon domesticum*/*Trichosporon montevideense*, 10 *P. guilliermondii*/*Pichia caribbica*, 11 *Candida metapsilosis*/*Candida orthopsilosis*/*C. parapsilosis*, 12 *C. metapsilosis*/*C. orthopsilosis*, 13 *C. metapsilosis*/*C. parapsilosis*, 14 82% homology to *C. metapsilosis*,15 *A. flavus*/*Aspergillus oryzae*, 16 *A. flavus* / *A. oryzae* /*Aspergillus parasiticus*, 17 95% homology to *R. microsporus*, 18 *R. oryzae*/*Rhizopus delemar*, 19 94% homology to *L. corymbifera*, 20 71% homology to *L. corymbifera*, 21 95% homology to *P. variotii*, 22 *Ulocladium chartarum*/*Ulocladium atrum*/*Ulocladium botrytis*, 23 *Alternaria alternata*/*U. chartarum*/*Montagnula dura*, 24 *A. flavus/A. oryzae/ F. solani*,25 *A. versicolor*/*Aspergillus sydowii*/*A. flavus*, 26 *A. sydowii*/*A. versicolor*, 27 91% homology to *A. versicolor*/*A. sydowii*/*A. flavus*, 28 75% homology to *A. versicolor*/*A. sydowii*/*A. flavus*, 29 42% query coverage when BLAST, 30 86% homology to *P. zopfii*.
